# Supplementary material for: Chemical Profiling of Polyphenolics in Eucalyptus globulus and Evaluation of Its Hepato–Renal Protective Potential Against Cyclophosphamide Induced Toxicity in Mice
Source: PubMed Central journal article supplement (PMC6769961; doi:10.3390/antiox8090415), 2019-09-19
Supplement: antioxidants-08-00415-s001.pdf [file antioxidants-08-00415-s001.pdf]

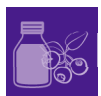

## Supplementary Material

Chemical Profiling of Polyphenolics in *Eucalyptus globulus* and Evaluation of Its Hepato-Renal Protective Potential Against Cyclophosphamide Induced Toxicity in Mice

Mosad A. Ghareeb <sup>1,\*</sup>, Mansour Sobeh <sup>2,6</sup>, Walaa H. El-Maadawy <sup>3</sup>, Hala Sh. Mohammed <sup>4</sup>, Heba Khalil <sup>5</sup>, Sanaa Botros <sup>3</sup> and Michael Wink <sup>2,\*</sup>

<sup>1</sup> Medicinal Chemistry Department, Theodor Bilharz Research Institute, Kornaish El Nile, Warrak El-Hadar, Imbaba (P.O. 30), Giza 12411, Egypt

<sup>2</sup> Institute of Pharmacy and Molecular Biotechnology, Heidelberg University, 44883-2462 Heidelberg, Germany

<sup>3</sup> Pharmacology Department, Theodor Bilharz Research Institute, Kornaish El Nile, Warrak El-Hadar, Imbaba (P.O. 30), Giza 12411, Egypt

<sup>4</sup> Department of Pharmacognosy, Faculty of Pharmacy (Girls), Al-Azhar University, Cairo 11311, Egypt

<sup>5</sup> Pathology Department, Theodor Bilharz Research Institute, Kornaish El Nile, Warrak El-Hadar, Imbaba (P.O. 30), Giza 12411, Egypt

<sup>6</sup> AgroBioSciences Research Division, Mohammed VI Polytechnic University, Lot 660–Hay MoulayRachid, 43150 Ben-Guerir, Morocco

\* Correspondence: m.ghareeb@tbri.gov.eg; +20201012346834 (M.A.G.); wink@uni-heidelberg.de; +49 (0)6221 54-4880 (M.W.)

| Table of Contents                                                     | Page |
|-----------------------------------------------------------------------|------|
| S1: Annotation of the polyphenolic compounds using HPLC-DAD-ESI-MS/MS | 2    |
| S2: Structural elucidation of the isolated phenolic compounds         | 4    |

## Annotation of The Polyphenolic Compounds Using HPLC-DAD-ESI-MS/MS (S1)

*Phenolic Acids and Their Derivatives*

**Compound 3** was detected at *Rt* 1.41 min, it showed a deprotonated ion [M-H]<sup>-</sup> at *m/z* 169 and a diagnostic fragment ion at *m/z* 125 corresponding to the loss of CO<sub>2</sub> moiety (*-m/z* 44 u) [M-H-CO<sub>2</sub> moiety]<sup>-</sup>, it could be identified as gallic acid [34]. **Compound 4** was detected at *Rt* 6.69, it showed a deprotonated ion [M-H]<sup>-</sup> at *m/z* 183 and MS<sup>n</sup> ions were observed at *m/z* 169, 168, 125, 109, and 93, it was tentatively identified as methylgallate [35].

*Flavonoids*

**Compound 12** was detected at *Rt* 18.68 min, it showed a deprotonated molecule [M-H]<sup>-</sup> at *m/z* 491 and MS fragment ion at *m/z* 315 [M-H-glucuronide moiety]<sup>-</sup> corresponding to the loss of glucuronide moiety (*-m/z* 176 u) was assigned to isorhamnetin aglycone, and key fragment ions for aglycone were observed at *m/z* 271, 179 and 151. Thus, compound 12 could be identified as isorhamnetin 3-O-β-D-glucuronoside [36]. **Compound 18** was detected at *Rt* 25.31 min, it showed a deprotonated molecule [M-H]<sup>-</sup> at *m/z* 329, and MS<sup>n</sup> ions at *m/z* 314 [M-H-CH<sub>3</sub>]<sup>-</sup>, 299 [M-H-2CH<sub>3</sub>]<sup>-</sup>, 285 [M-H-CO<sub>2</sub>]<sup>-</sup> and 243 [M-H-C<sub>2</sub>H<sub>2</sub>O-CO<sub>2</sub>]<sup>-</sup>, thus it could be identified as quercetin-3,4'-dimethyl ether [37,38]. Compound 22 was detected at *Rt* 40.34 min, it showed a deprotonated molecule [M-H]<sup>-</sup>

at  $m/z$  303, and  $MS^n$  ions were obtained at  $m/z$  301, 285, 179, 177, and 125, it could be identified as dihydroquercetin (taxifolin) [39].

#### Hydrolyzable Tannins (Gallotannins and Ellagitannins)

**Compound 7** was detected at  $R_t$  13.55 min, it showed a deprotonated molecule  $[M-H]^-$  at  $m/z$  537 and  $MS^n$  fragment ions at  $m/z$  385  $[M-H-152]^-$  due to the loss of galloyl moiety (-152 u), 313  $[M-H-224]^-$ , a diagnostic ion was observed at  $m/z$  271  $[M-H-266]^-$ , this fragmentation pattern was typically assigned to 6S,9R-ionone 9-O-(6'-O-galloyl)- $\beta$ -D-glucopyranoside (Mallophenol B) [40]. **Compound 9** was detected at  $R_t$  16.29 min, it showed a deprotonated molecule  $[M-H]^-$  at  $m/z$  483, producing daughter ion at  $m/z$  271  $[M-H-212]^-$  due to the total loss of galloyl moiety (- $m/z$  152 u), water molecule (- $m/z$  18 u) and another fragment (- $m/z$  42 u), characteristic ions for galloylglucose derivatives were observed at  $m/z$  331, 313, 169, 151 and 137, thus it could be assigned to digalloylglucose, this compound was previously identified in both of Algerian *Eucalyptus globulus* fruits [41] and Egyptian *Eucalyptus camaldulensis* leaves [42]. **Compound 10** was detected at  $R_t$  17.16 min, it showed a deprotonated molecule  $[M-H]^-$  at  $m/z$  421, producing daughter ion at  $m/z$  169  $[M-H\text{-benzyl moiety-glucosyl moiety} (\Sigma\text{-}m/z\ 252\ \text{u})]^-$  due to the loss of benzyl and glucose moieties. Other  $MS^n$  fragment ions were observed at  $m/z$  331 due to the neutral loss of benzyl moiety (- $m/z$  90 u)  $[M-H\text{-benzyl moiety}]^-$ , also a fragment ion was observed at  $m/z$  313 due to the loss of water molecule (- $m/z$  18 u) from  $[M-H\text{-benzyl moiety-H}_2\text{O}]^-$ , it could be identified as benzyl-galloylglucose [42]. **Compound 11** was detected at  $R_t$  17.50 min, it showed a deprotonated molecule  $[M-H]^-$  at  $m/z$  481 and characteristic  $MS^n$  fragment ions for digalloylglucose nucleus at  $m/z$  463  $[M-H\text{-H}_2\text{O} (-m/z\ 18\ \text{u})]^-$ , 329  $[M-H\text{-galloyl moiety} (-m/z\ 152\ \text{u})]^-$ , 301  $[M-H\text{-H}_2\text{O-glucose moiety} (-m/z\ 180\ \text{u})]^-$ , 313 211, and 169; therefore, it could be assigned to hexahydroxydiphenyl-glucose (HHDP-glucose) [42]. **Compound 13** was detected at  $R_t$  19.64 min, it showed a deprotonated molecule  $[M-H]^-$  at  $m/z$  689 and it's a diagnostic fragment ion at  $m/z$  537  $[M-H-152]^-$ , which corresponds to the loss of a galloyl moiety, it can be interpreted as galloyl cypellocarpin B [42]. **Compound 14** was detected at  $R_t$  19.82 min, it showed a deprotonated molecule  $[M-H]^-$  at  $m/z$  939 and a daughter ion at  $m/z$  769 corresponding to loss of gallic acid moiety  $[M-H-170]^-$ , in addition to the appearance of  $MS^n$  fragment ions at  $m/z$  787 and 635 which corresponds to the loss of the first galloyl moiety  $[M-H-152]^-$ , and the second one  $[M-H-304]^-$  respectively, accordingly this compound can be interpreted as pentagalloylglucose [41]. **Compound 15** was detected at  $R_t$  20.12 min, it showed a deprotonated molecule  $[M-H]^-$  at  $m/z$  635 and a daughter ion as a base peak at  $m/z$  483 corresponding to the loss of galloyl moiety  $[M-H-152]^-$ , also diagnostic  $MS^n$  fragment ions were observed at  $m/z$  465  $[M-H-170]^-$  and 423  $[M-H-212]^-$  due to the loss of gallic acid moiety, and the release of another galloyl moiety followed by cross ring fragmentation of glucose, 331  $[M-H-152-152]^-$ , 313  $[M-H-152-152-18]^-$ , 271  $[M-H-212-152]^-$  due to the loss of galloyl moieties, and water molecule; it could be interpreted as trigalloylglucose [41]. **Compound 16** was detected at  $R_t$  21.54 min, it showed a deprotonated molecule  $[M-H]^-$  at  $m/z$  625 and a daughter ion at  $m/z$  473 corresponding to the loss of galloyl moiety  $[M-H-152]^-$ , furthermore diagnostic  $MS^n$  fragment ions were appeared at  $m/z$  607  $[M-H\text{-H}_2\text{O}]^-$  due to the loss of water molecule (- $m/z$  18 u), 437  $[M-H-18-170]^-$  corresponding to the loss of water and gallic acid moieties, thus compound could be characterized as HHDP-diglucoside [43]. **Compound 17** was detected at  $R_t$  24.91 min, it showed a deprotonated molecule  $[M-H]^-$  at  $m/z$  629 and  $MS^n$  fragment ions at  $m/z$  477  $[M-H\text{-galloyl moiety}]^-$  due to the loss of galloyl moiety (- $m/z$  152 u) and corresponding to methylellagic acid glucoside,  $m/z$  315  $[M-H\text{-galloyl glucoside moiety}]^-$  due to the loss of galloyl glucoside moiety (- $m/z$  314 u) and corresponding to methyl ellagic acid, and a base peak at  $m/z$  301 which corresponding to ellagic acid nucleus, this fragmentation pattern was typically assigned to galloyl ester of a methylellagic acid glucoside [41]. **Compound 19** was detected at  $R_t$  27.17 min, it showed a deprotonated molecule  $[M-H]^-$  at  $m/z$  1085 and a diagnostic fragment ions at  $m/z$  765  $[M-H-320]^-$ , 633  $[M-H-452]^-$  due to the loss of trigalloyl moieties (- $m/z$  452 u) which corresponding to HHDP moiety, so it could be identified as eucalbanin A or its isomer cornusiin B [41]. **Compound 20** was detected at  $R_t$  28.52 min, it showed a deprotonated molecule  $[M-H]^-$  at  $m/z$  519 and fragment ions at  $m/z$  353  $[M-H-166]^-$ , 335  $[M-H-184]^-$  due to the loss of oleuropeic acid

moiety ( $-m/z$  184 u), and 233 [M-H-286]<sup>-</sup>, this compound could be identified as cypellocarpin C [41]. **Compound 21** was detected at  $R_t$  29.61 min, it showed a deprotonated molecule [M-H]<sup>-</sup> at  $m/z$  1415 and fragment ions at  $m/z$  1113 [M-H-302]<sup>-</sup> due to the loss of one HHDP moiety ( $-m/z$  302 u), 933 [M-H-482]<sup>-</sup>, 783 [M-H-632]<sup>-</sup> and 633 [M-H-782]<sup>-</sup>, this compound could be characterized as Di (HHDP-galloylglucose)-pentose [41]. **Compound 23** was detected at  $R_t$  41.82 min, it showed a deprotonated molecule [M-H]<sup>-</sup> at  $m/z$  617 and fragment ions were appeared at  $m/z$  465 [M-H-152]<sup>-</sup>, 393 [M-H-224]<sup>-</sup>, 317 [M-H-300]<sup>-</sup>, 241 [M-H-376]<sup>-</sup> and 169 [M-H-448]<sup>-</sup>, these fragmentation pattern was assigned to trigalloyllevoglucosan [44]. **Compound 24** was detected at  $R_t$  53.13 min, it showed a deprotonated molecule [M-H]<sup>-</sup> at  $m/z$  953 and MS<sup>n</sup> fragment ions at  $m/z$  635, 301 and 169, this fragmentation pattern was assigned to valoneoyl-digalloyl-glucopyranose. **Compound 26** was detected at  $R_t$  56.04 min, it showed a deprotonated molecule [M-H]<sup>-</sup> at  $m/z$  469 as well as MS<sup>n</sup> fragment ions at  $m/z$  425 [M-H-CO<sub>2</sub> ( $-m/z$  44 u)]<sup>-</sup>, 301 [M-H-168]<sup>-</sup> and 169 [M-H-300]<sup>-</sup>, it was tentatively identified as valoneic acid dilactone [41].

### Structural Elucidation of The Isolated Phenolic Compounds (S2)

**Compound 1** was isolated as off-white amorphous powder, observed as faint violet fluorescence under short UV light, which turned to deep blue colour with FeCl<sub>3</sub> spray reagent. Molisch test was positive indicating a gallic acid glycoside. Acid hydrolysis afforded gallic acid in organic layer and rhamnose in aqueous layer. <sup>1</sup>H-NMR spectral data (400 MHz, DMSO-*d*<sub>6</sub>) δ<sub>H</sub> ppm: two symmetrical aromatic protons were resonated at δ<sub>H</sub> 6.99 ppm (2H, s, H-2 and H-6), anomeric proton of sugar moiety at δ<sub>H</sub> 4.91 ppm (1H, d,  $J=7.44$  Hz) and remaining sugar protons at δ<sub>H</sub> 3.17-3.74 ppm (m). <sup>13</sup>C-NMR spectral data (100 MHz, DMSO-*d*<sub>6</sub>), carbon atoms of gallic acid nucleus were resonated at δ<sub>C</sub> 167.9 (CO), 145.8 (C-3, C-5), 138.4 (C-4), 120.9 (C-1), 109.1 ppm (C-2, C-6). While, carbon atoms of *O*-β-xylopyranosyl moiety were resonated at δ<sub>C</sub> 103.3 (C-1'), 76.8 (C-3'), 73.6 (C-2'), 69.8 (C-4') & 65.6 ppm (C-5'). Based on the above mentioned chromatographic properties, NMR data and literature [45], compound 3 was identified as 4-(*O*-β-D-xylopyranosyloxy)-3,5-di-hydroxy-benzoic acid (Gallic acid pentoside).

**Compound 2** was isolated as off-white amorphous powder, observed as faint violet fluorescence under short UV light, which turned to deep blue colour with FeCl<sub>3</sub> spray reagent. Molisch test was positive indicating a gallic acid glycoside. Acid hydrolysis afforded gallic acid in organic layer and rhamnose in aqueous layer. <sup>1</sup>H-NMR spectral data (400 MHz, DMSO-*d*<sub>6</sub>), two symmetrical aromatic protons were resonated at δ<sub>H</sub> 6.97 ppm (2H, s, H-2 and H-6), anomeric proton of sugar moiety at δ<sub>H</sub> 4.63 ppm (1H, brs, H-1'), remaining sugar protons were resonated at δ<sub>H</sub> 3.25-3.55 ppm (m) and aliphatic methyl protons at δ<sub>H</sub> 1.09 ppm (3H, d,  $J=6.8$  Hz, CH<sub>3</sub>-C-6'). <sup>13</sup>C-NMR spectral data (100 MHz, DMSO-*d*<sub>6</sub>), carbon atoms of gallic acid nucleus were resonated at δ<sub>C</sub> 167.9 (COO), 145.8 (C-3, C-5), 138.4 (C-4), 120.8 (C-1), and 109.1 ppm (C-2 & C-6). On the other hand, carbon atoms of *O*-α-L-rhamnopyranosyl moiety were resonated at δ<sub>C</sub> 104 (C-1'), 72.7 (C-4'), 70.3 (C-3 & 4), 69.4 (C-5'), and 18.9 ppm (CH<sub>3</sub>-6'). Based on the above mentioned chromatographic properties, NMR data and literature [45], compound 4 was identified as 4-(*O*-α-L-rhamnopyranosyloxy)-3,5-di-hydroxy-benzoic acid (Gallic acid rhamnoside).

**Compound 3** was isolated as off-white amorphous powder, observed as faint violet fluorescence under short UV light, which turned to deep blue colour with FeCl<sub>3</sub> spray reagent. UV spectral data showed a characteristic band at λ<sub>max</sub> = 272 nm. <sup>1</sup>H-NMR spectral data (400 MHz, DMSO-*d*<sub>6</sub>), revealed the presence of two symmetrical protons located in the aromatic region at δ<sub>H</sub> 6.94 ppm (2H, s, H-2 and H-6). <sup>13</sup>C-NMR spectral data (100 MHz, DMSO-*d*<sub>6</sub>) showed a set of aromatic carbons were resonated at δ<sub>C</sub> 109.1 ppm (C-2, C-6), 120.8 ppm (C-1), 138.4 ppm (C-4), 145.8 ppm (C-3, C-5) and carbonyl carbon at δ<sub>C</sub> 167.9 ppm (-CO) [46]. Based on the above mentioned NMR data, comparison with authentic samples (CO-PC) and literature, compound 1 was identified as 3,4,5-trihydroxy-benzoic acid (gallic acid).

**Compound 4** was isolated as off-white amorphous powder, observed as faint violet fluorescence under short UV light, which turned to deep blue colour with FeCl<sub>3</sub> spray reagent. UV spectral data showed a characteristic band at λ<sub>max</sub> = 272 nm. <sup>1</sup>H-NMR spectral data (400 MHz,

DMSO- $d_6$ ), showed two symmetrical protons in the aromatic region at  $\delta_H$  6.91 ppm (2H, brs, H-2 and H-6), another characteristic signal for aliphatic methoxy protons was observed at  $\delta_H$  3.7 ppm (3H, s, -OCH<sub>3</sub>). <sup>13</sup>C-NMR spectral data (100 MHz, DMSO- $d_6$ ), showed three types of carbon signals including oxygenated aliphatic carbon at  $\delta_C$  51.68 ppm (OCH<sub>3</sub>), a set of aromatic carbon signals were observed at  $\delta_C$  108.57 ppm (C-2, C-6), 119.36 ppm (C-1), 138.48 ppm (C-4), 145.56 ppm (C-3, C-5) and carbonyl carbon was detected at  $\delta_C$  166.41 ppm (-CO) [47,48]. Based on the above mentioned chromatographic properties, NMR data, comparison with authentic samples (CO-PC) and literature, compound 2 was identified as methyl 3,4,5-trihydroxybenzoate (methyl gallate).
